# Supplementary material
Source: Springer Nature journal article supplement (https://www.springermedizin.de/resource/supplementary/12967_2013_1737_MOESM4_ESM.pdf/9575196)

Mother / Child pairs: ID1 ID2 ID3 ID4 ID5 ID6 ID7 ID8 ID9 ID10

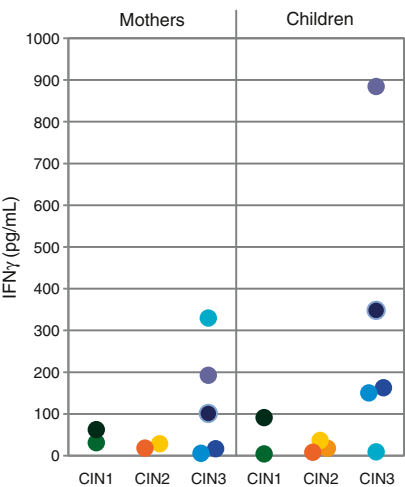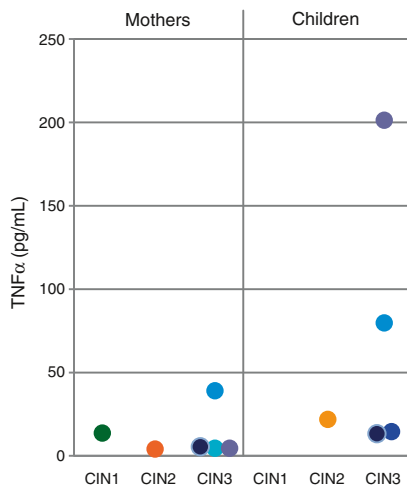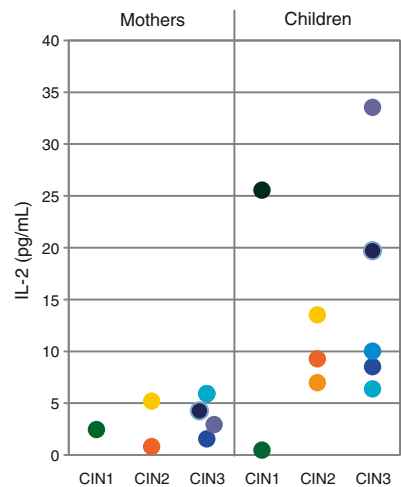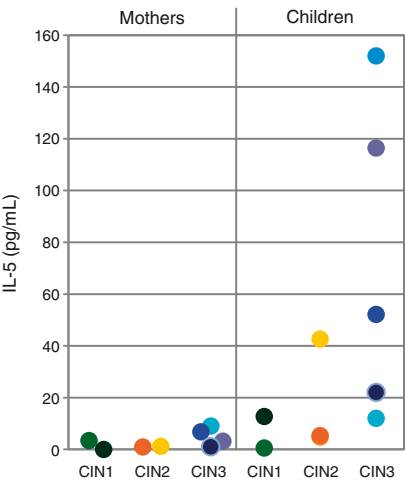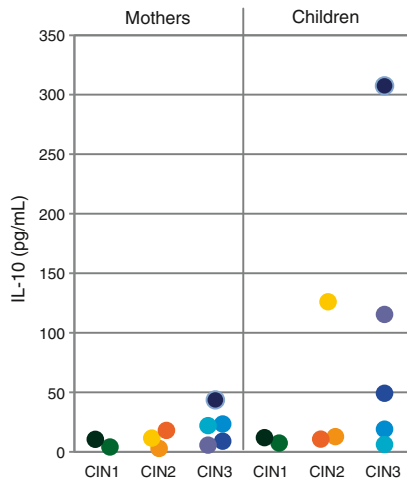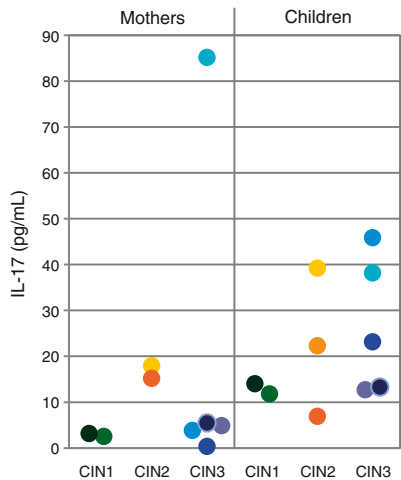

Supplement: MOESM4 [file 9575196]
